# Supplementary material for: Leaf reflectance can surrogate foliar economics better than physiological traits across macrophyte species
Source: Springer Nature journal article supplement (doi:10.1186/s13007-021-00816-4), 2021-11-10
Supplement: MOESM1 [file 13007_2021_816_MOESM1_ESM.pdf]

# Leaf reflectance can surrogate foliar economics better than physiological traits across macrophyte species

Paolo Villa<sup>1,\*</sup>, Rossano Bolpagni<sup>1,2</sup>, Monica Pinardi<sup>1</sup>, Viktor R. Tóth<sup>3,\*</sup>

<sup>1</sup> *Institute for Electromagnetic Sensing of the Environment, National Research Council of Italy (CNR-IREA), Milan (Italy)*

<sup>2</sup> *Department of Chemistry, Life Sciences and Environmental Sustainability, University of Parma, Parma (Italy)*

<sup>3</sup> *Balaton Limnological Research Institute, Tihany (Hungary)*

**\*corresponding authors:**

P. Villa: villa.p@irea.cnr.it (email), +39.02-23699292 (phone)

V. R. Tóth: toth.viktor@blki.hu (email), +36.87-448244 (phone)

## Supplementary Material

**Supplementary Table S1.** Summary of *in situ* samples collected for this study.

| Date       | Site    | Location |         | Species           | Reflectance spectra | Number of leaves sampled |                                |                  |
|------------|---------|----------|---------|-------------------|---------------------|--------------------------|--------------------------------|------------------|
|            |         | Lat (N)  | Lon (E) |                   |                     | Photophysiology traits   | Biochemistry traits (pigments) | Structure traits |
| 21/07/2016 | Hídvégi | 46.6524  | 17.1433 | <i>Trapa</i>      | -                   | -                        | 3                              | 3                |
| 21/07/2016 | Hídvégi | 46.6581  | 17.1231 | <i>Trapa</i>      | -                   | -                        | 3                              | 3                |
| 21/07/2016 | Hídvégi | 46.6589  | 17.1238 | <i>Trapa</i>      | -                   | -                        | 3                              | 3                |
| 21/07/2016 | Hídvégi | 46.6131  | 17.1674 | <i>Trapa</i>      | -                   | -                        | 3                              | 3                |
| 22/07/2016 | Hídvégi | 46.6045  | 17.1665 | <i>Trapa</i>      | -                   | -                        | 3                              | 3                |
| 22/07/2016 | Hídvégi | 46.6003  | 17.1594 | <i>Trapa</i>      | -                   | -                        | 3                              | 3                |
| 22/07/2016 | Hídvégi | 46.6077  | 17.1428 | <i>Trapa</i>      | -                   | -                        | 3                              | 3                |
| 22/07/2016 | Hídvégi | 46.6135  | 17.1406 | <i>Trapa</i>      | -                   | -                        | 2                              | 2                |
| 21/07/2016 | Hídvégi | 46.6152  | 17.1675 | <i>Nuphar</i>     | -                   | -                        | 3                              | 3                |
| 21/07/2016 | Hídvégi | 46.6134  | 17.1676 | <i>Nymphaea</i>   | -                   | -                        | 3                              | 3                |
| 21/07/2016 | Hídvégi | 46.6146  | 17.1673 | <i>Nymphaea</i>   | -                   | -                        | 3                              | 3                |
| 27/07/2016 | Mantua  | 45.1578  | 10.7463 | <i>Nelumbo</i>    | 6                   | 6                        | -                              | -                |
| 27/07/2016 | Mantua  | 45.1608  | 10.7345 | <i>Nuphar</i>     | 6                   | 6                        | -                              | -                |
| 27/07/2016 | Mantua  | 45.1601  | 10.7294 | <i>Phragmites</i> | 6                   | 6                        | -                              | -                |
| 27/07/2016 | Mantua  | 45.1608  | 10.7357 | <i>Trapa</i>      | 5                   | 5                        | -                              | -                |
| 27/07/2016 | Mantua  | 45.1611  | 10.7331 | <i>Trapa</i>      | 6                   | 6                        | -                              | -                |
| 28/07/2016 | Mantua  | 45.1624  | 10.7100 | <i>Ludwigia</i>   | -                   | 6                        | -                              | -                |
| 28/07/2016 | Mantua  | 45.1578  | 10.7141 | <i>Phragmites</i> | -                   | 6                        | -                              | -                |
| 29/07/2016 | Mantua  | 45.1709  | 10.7971 | <i>Ludwigia</i>   | -                   | 3                        | -                              | -                |
| 29/07/2016 | Mantua  | 45.1643  | 10.8040 | <i>Trapa</i>      | 6                   | 6                        | -                              | -                |
| 29/07/2016 | Mantua  | 45.1685  | 10.7929 | <i>Trapa</i>      | 6                   | 6                        | -                              | -                |

|            |         |         |         |                 |    |    |    |    |
|------------|---------|---------|---------|-----------------|----|----|----|----|
| 29/07/2016 | Mantua  | 45.1513 | 10.8121 | <i>Trapa</i>    | 6  | 6  | -  | -  |
| 29/05/2017 | Mantua  | 45.1624 | 10.7101 | <i>Ludwigia</i> | -  | 12 | 9  | 9  |
| 29/05/2017 | Mantua  | 45.1631 | 10.7819 | <i>Nelumbo</i>  | 3  | 3  | -  | -  |
| 29/05/2017 | Mantua  | 45.1629 | 10.7769 | <i>Nelumbo</i>  | 3  | 3  | -  | -  |
| 29/05/2017 | Mantua  | 45.1604 | 10.7670 | <i>Nelumbo</i>  | 3  | 3  | -  | -  |
| 29/05/2017 | Mantua  | 45.1625 | 10.7092 | <i>Nuphar</i>   | -  | 11 | 11 | 12 |
| 29/05/2017 | Mantua  | 45.1608 | 10.7346 | <i>Nuphar</i>   | 4  | 4  | 4  | 4  |
| 29/05/2017 | Mantua  | 45.1689 | 10.7869 | <i>Nuphar</i>   | 4  | 4  | -  | -  |
| 29/05/2017 | Mantua  | 45.1606 | 10.7358 | <i>Trapa</i>    | 4  | 4  | -  | -  |
| 30/05/2017 | Mantua  | 45.1705 | 10.7929 | <i>Nymphaea</i> | 4  | 4  | 4  | 4  |
| 30/05/2017 | Mantua  | 45.1647 | 10.8059 | <i>Trapa</i>    | 4  | 4  | 4  | 4  |
| 30/05/2017 | Mantua  | 45.1705 | 10.7929 | <i>Trapa</i>    | 4  | 4  | 4  | 4  |
| 30/05/2017 | Mantua  | 45.1686 | 10.7926 | <i>Trapa</i>    | 4  | 4  | 4  | 4  |
| 30/05/2017 | Mantua  | 45.1490 | 10.8146 | <i>Trapa</i>    | 6  | 6  | 4  | 4  |
| 14/06/2017 | Hídvégi | 46.6040 | 17.1667 | <i>Trapa</i>    | 6  | 6  | -  | -  |
| 14/06/2017 | Hídvégi | 46.6523 | 17.1427 | <i>Trapa</i>    | 6  | 6  | -  | -  |
| 14/06/2017 | Hídvégi | 46.6584 | 17.1231 | <i>Trapa</i>    | 6  | 6  | -  | -  |
| 14/06/2017 | Hídvégi | 46.6124 | 17.1414 | <i>Trapa</i>    | 6  | 6  | -  | -  |
| 27/07/2017 | Mantua  | 45.1627 | 10.7092 | <i>Ludwigia</i> | 7  | 9  | 7  | 9  |
| 27/07/2017 | Mantua  | 45.1633 | 10.7828 | <i>Nelumbo</i>  | 6  | 9  | 9  | 9  |
| 27/07/2017 | Mantua  | 45.1623 | 10.7739 | <i>Nelumbo</i>  | 6  | 6  | 6  | 6  |
| 27/07/2017 | Mantua  | 45.1611 | 10.7682 | <i>Nelumbo</i>  | 5  | 6  | 6  | 6  |
| 27/07/2017 | Mantua  | 45.1627 | 10.7092 | <i>Nuphar</i>   | 3  | 3  | 2  | 3  |
| 27/07/2017 | Mantua  | 45.1633 | 10.7473 | <i>Trapa</i>    | 9  | 9  | 7  | 8  |
| 28/07/2017 | Mantua  | 45.1704 | 10.7921 | <i>Nuphar</i>   | 6  | 5  | 6  | 6  |
| 28/07/2017 | Mantua  | 45.1705 | 10.7927 | <i>Nymphaea</i> | 6  | 6  | 6  | 6  |
| 28/07/2017 | Mantua  | 45.1688 | 10.7913 | <i>Trapa</i>    | 6  | 6  | 6  | 6  |
| 28/07/2017 | Mantua  | 45.1652 | 10.8053 | <i>Trapa</i>    | 6  | 6  | 6  | 6  |
| 28/07/2017 | Mantua  | 45.1495 | 10.8142 | <i>Trapa</i>    | 6  | 6  | 5  | 6  |
| 17/07/2018 | Hídvégi | 46.6149 | 17.1675 | <i>Nuphar</i>   | 6  | 6  | -  | -  |
| 17/07/2018 | Hídvégi | 46.6146 | 17.1674 | <i>Nymphaea</i> | 6  | 6  | -  | -  |
| 17/07/2018 | Hídvégi | 46.6524 | 17.1431 | <i>Trapa</i>    | 5  | 6  | -  | -  |
| 17/07/2018 | Hídvégi | 46.6588 | 17.1241 | <i>Trapa</i>    | 5  | 6  | -  | -  |
| 18/07/2018 | Hídvégi | 46.6003 | 17.1601 | <i>Trapa</i>    | 6  | 6  | -  | -  |
| 18/07/2018 | Hídvégi | 46.6127 | 17.1413 | <i>Trapa</i>    | 6  | 6  | -  | -  |
| 24/07/2018 | Varese  | 45.8065 | 8.7661  | <i>Ludwigia</i> | 12 | 12 | -  | -  |
| 24/07/2018 | Varese  | 45.8068 | 8.7717  | <i>Ludwigia</i> | 12 | 12 | -  | -  |
| 24/07/2018 | Varese  | 45.8144 | 8.7581  | <i>Nelumbo</i>  | 6  | 6  | -  | -  |
| 24/07/2018 | Varese  | 45.8138 | 8.7588  | <i>Nelumbo</i>  | 6  | 6  | -  | -  |
| 24/07/2018 | Varese  | 45.8042 | 8.7756  | <i>Trapa</i>    | 6  | 6  | -  | -  |
| 25/07/2018 | Mantua  | 45.1626 | 10.7092 | <i>Ludwigia</i> | 10 | 12 | 12 | 12 |
| 25/07/2018 | Mantua  | 45.1626 | 10.7098 | <i>Ludwigia</i> | 12 | 12 | 11 | 12 |
| 25/07/2018 | Mantua  | 45.1633 | 10.7838 | <i>Nelumbo</i>  | 6  | 6  | 6  | 6  |
| 25/07/2018 | Mantua  | 45.1614 | 10.7689 | <i>Nelumbo</i>  | 5  | 6  | 6  | 6  |
| 25/07/2018 | Mantua  | 45.1632 | 10.7475 | <i>Trapa</i>    | 6  | 6  | 5  | 6  |
| 26/07/2018 | Mantua  | 45.1704 | 10.7933 | <i>Nuphar</i>   | 6  | 6  | 6  | 6  |
| 26/07/2018 | Mantua  | 45.1704 | 10.7933 | <i>Nymphaea</i> | 6  | 6  | 6  | 6  |
| 26/07/2018 | Mantua  | 45.1652 | 10.8050 | <i>Trapa</i>    | 6  | 6  | 6  | 6  |
| 26/07/2018 | Mantua  | 45.1686 | 10.7920 | <i>Trapa</i>    | 6  | 6  | 6  | 6  |
| 26/07/2018 | Mantua  | 45.1482 | 10.8148 | <i>Trapa</i>    | 6  | 6  | 6  | 6  |

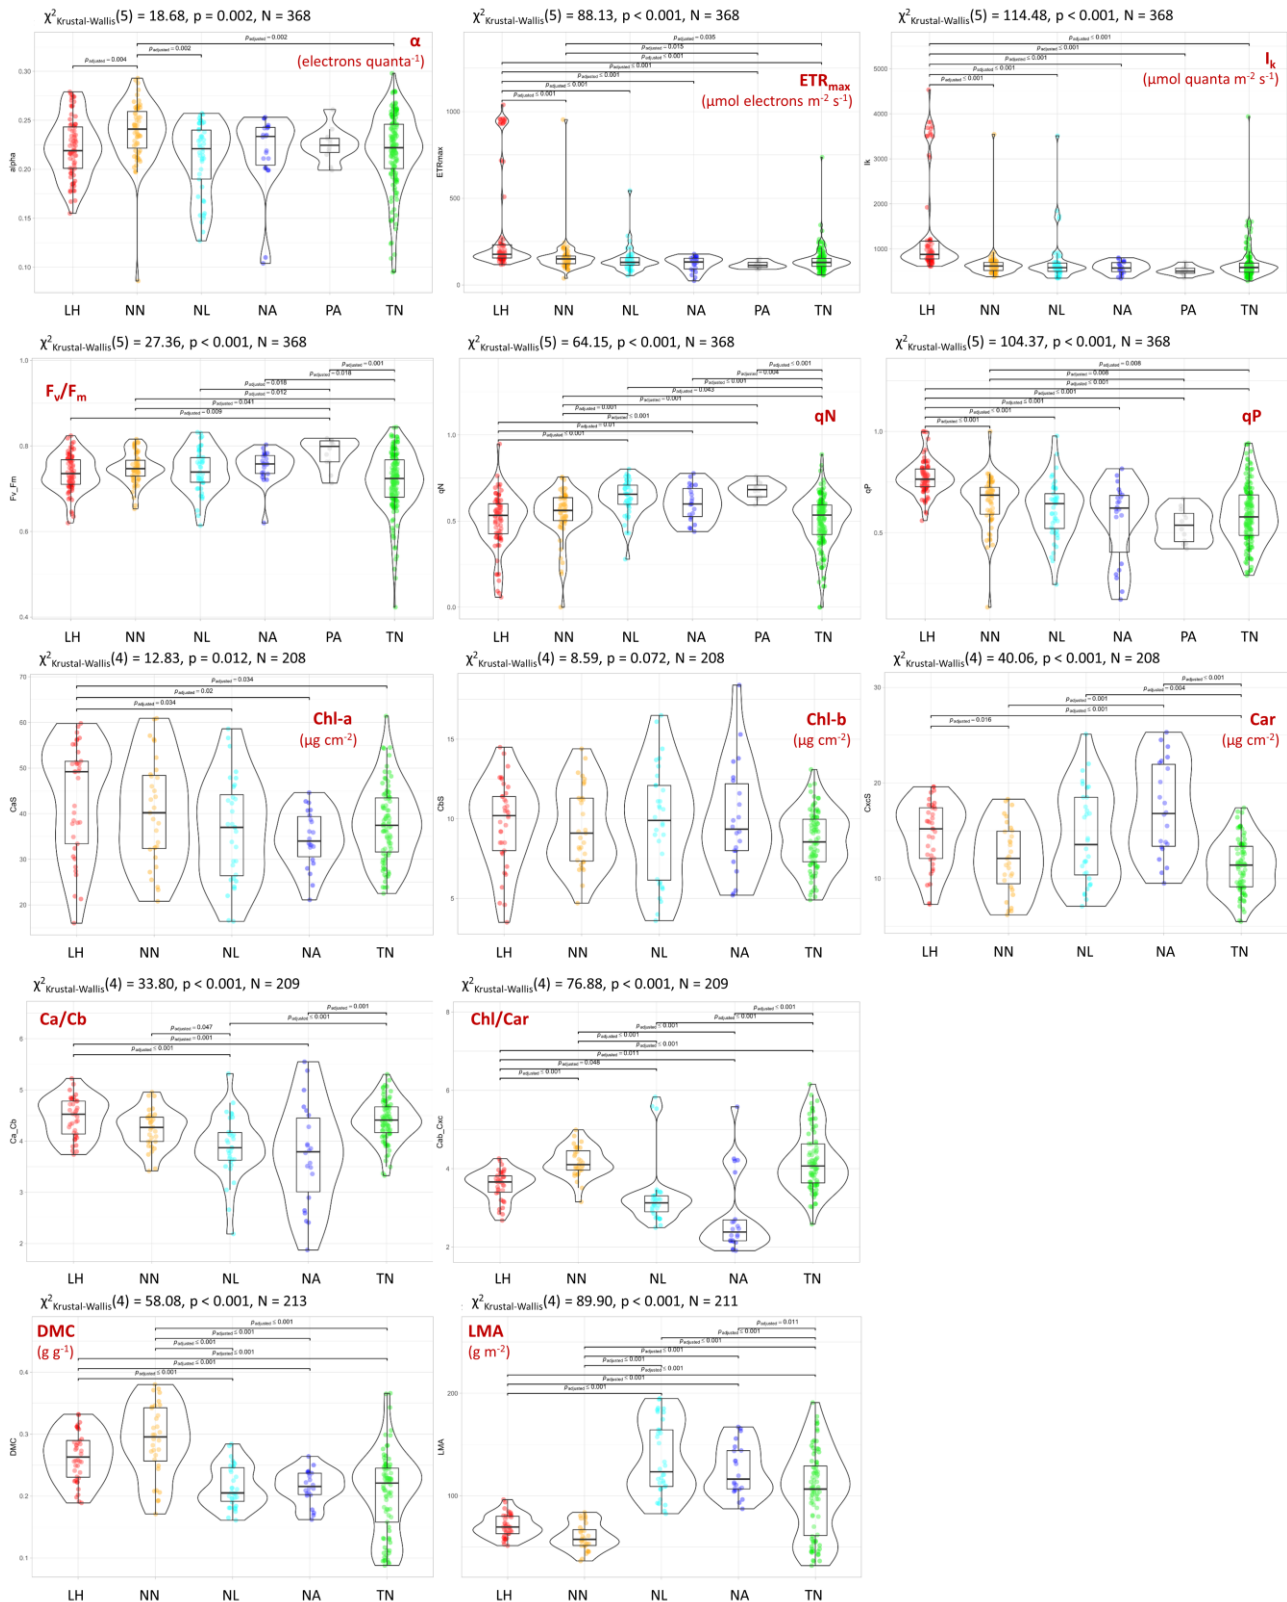

**Supplementary Figure S1.** Violin plots (with encompassed box plots) showing range and distribution of all leaf traits - photophysiological parameters, biochemistry (pigments) and leaf structure traits - measured over 6 macrophyte species (LH=*Ludwigia hexapetala*; NN=*Nelumbo nucifera*; NL=*Nuphar lutea*; NA=*Nymphaea alba*; PA=*Phragmites australis*; TN=*Trapa natans*). Plots show significant differences ( $p < 0.05$ ) in pairwise comparison performed via Dunn's post-hoc test with Benjamini-Hochberg adjustment.

**ETR<sub>max</sub>***All species (N=324)*★ Max R<sup>2</sup> in 400-1000 nm range★ Max R<sup>2</sup> in 400-800 nm range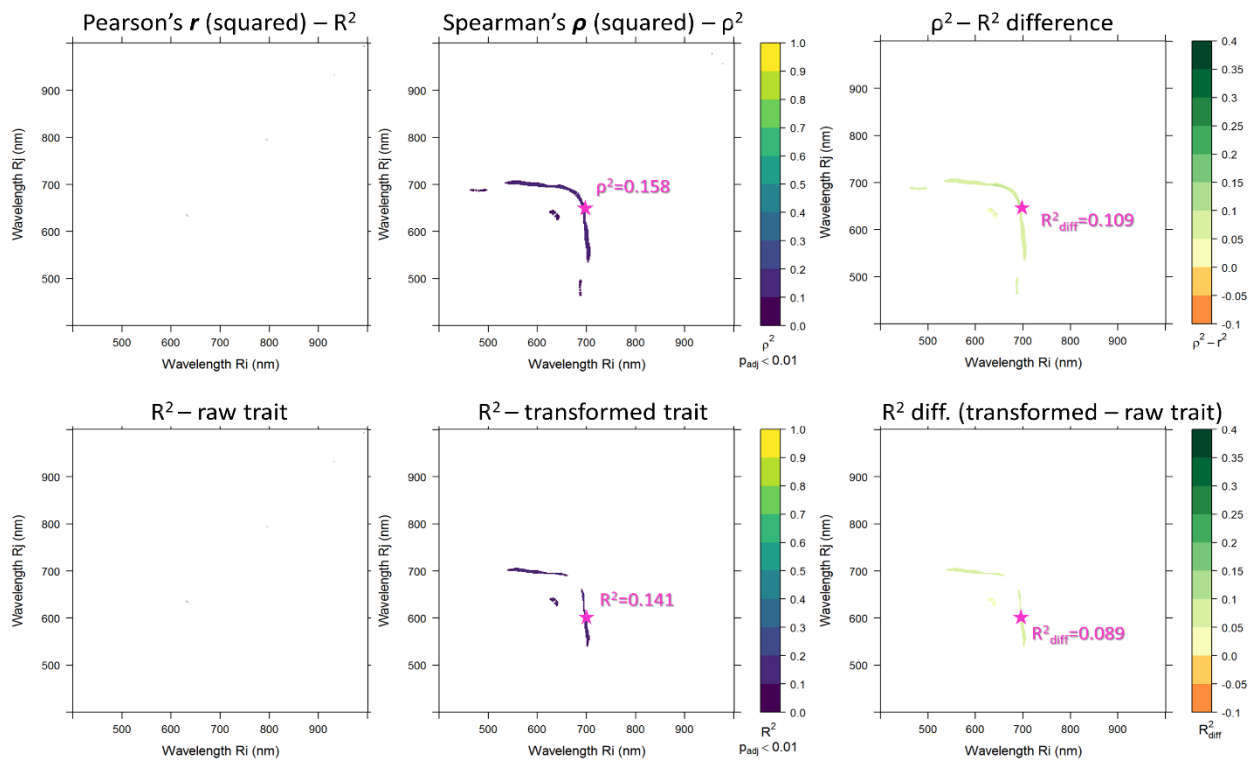

**Supplementary Figure S2.** Comparison of NDSI correlations ( $p < 0.01$ , Bonferroni adjusted) with ETR<sub>max</sub> for all samples ( $N = 324$ ), in the visible to near-infrared spectral range (400–1000 nm): computed using Pearson's  $r$  and Spearman's  $\rho$  on raw data (top row), or Pearson's  $r$  based on raw and transformed ( $1/\sqrt{ETR_{max}}$ ) data (bottom row).

**LMA***All species (N=152)*★ Max R<sup>2</sup> in 400-800 nm range★ Max R<sup>2</sup> in 400-2500 nm range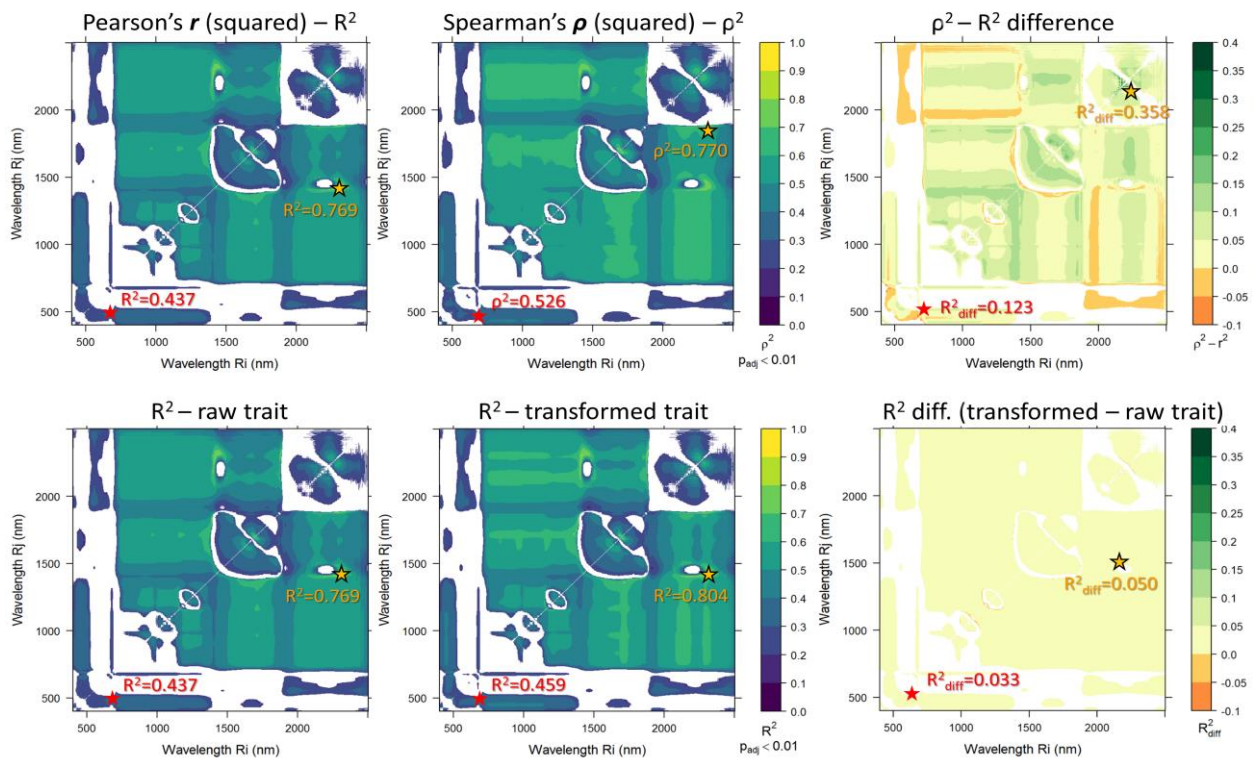

**Supplementary Figure S3.** Comparison of NDSI correlations ( $p < 0.01$ , Bonferroni adjusted) with LMA for all samples ( $N = 152$ ), in the full spectral range (400–2500 nm): computed using Pearson's  $r$  and Spearman's  $\rho$  on raw data (top row), or Pearson's  $r$  based on raw and transformed ( $\sqrt{LMA}$ ) data (bottom row).

All species (N = 324)

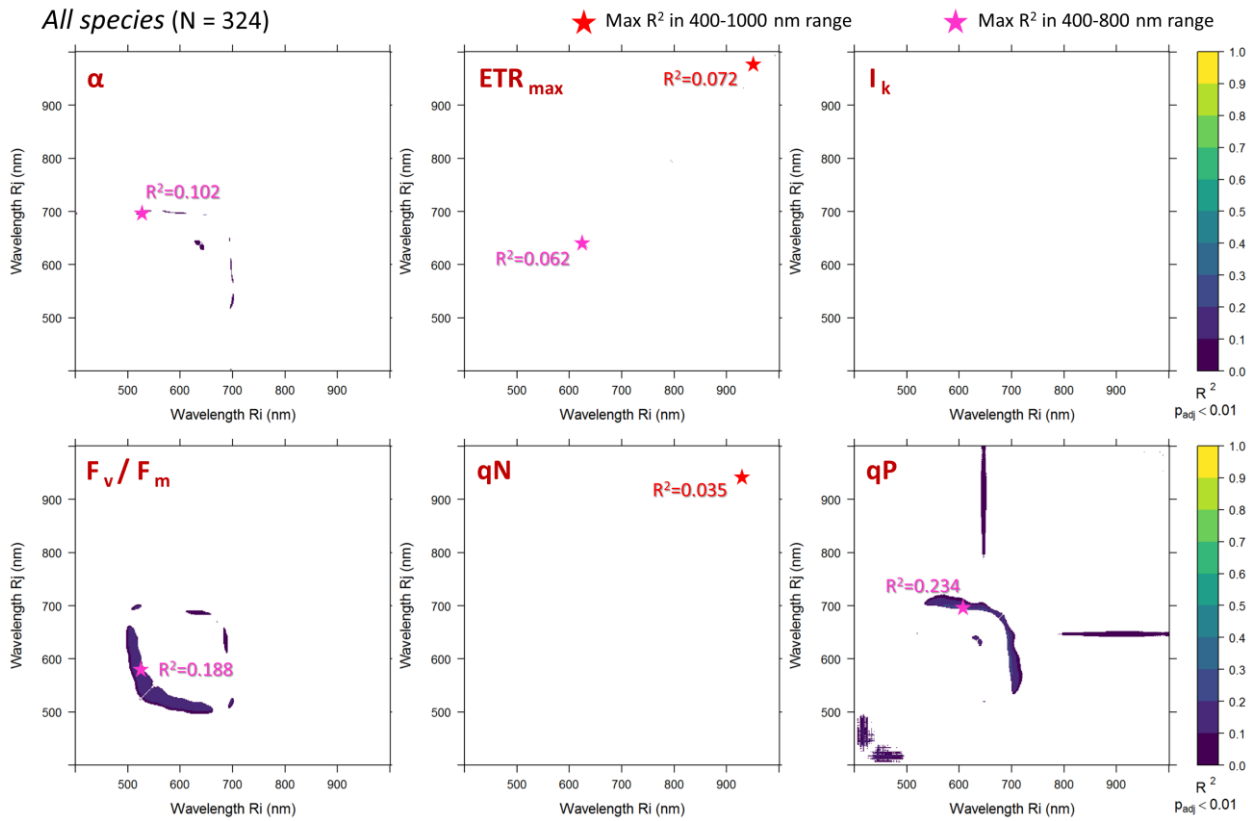

**Supplementary Figure S4.** Statistically significant ( $p < 0.01$ , Bonferroni adjusted) NDSI correlations with leaf photophysiology parameters measured on all macrophyte species sampled (N = 324) in the visible to near-infrared spectral range (400-1000 nm).

*Ludwigia hexapetala* (N = 53)

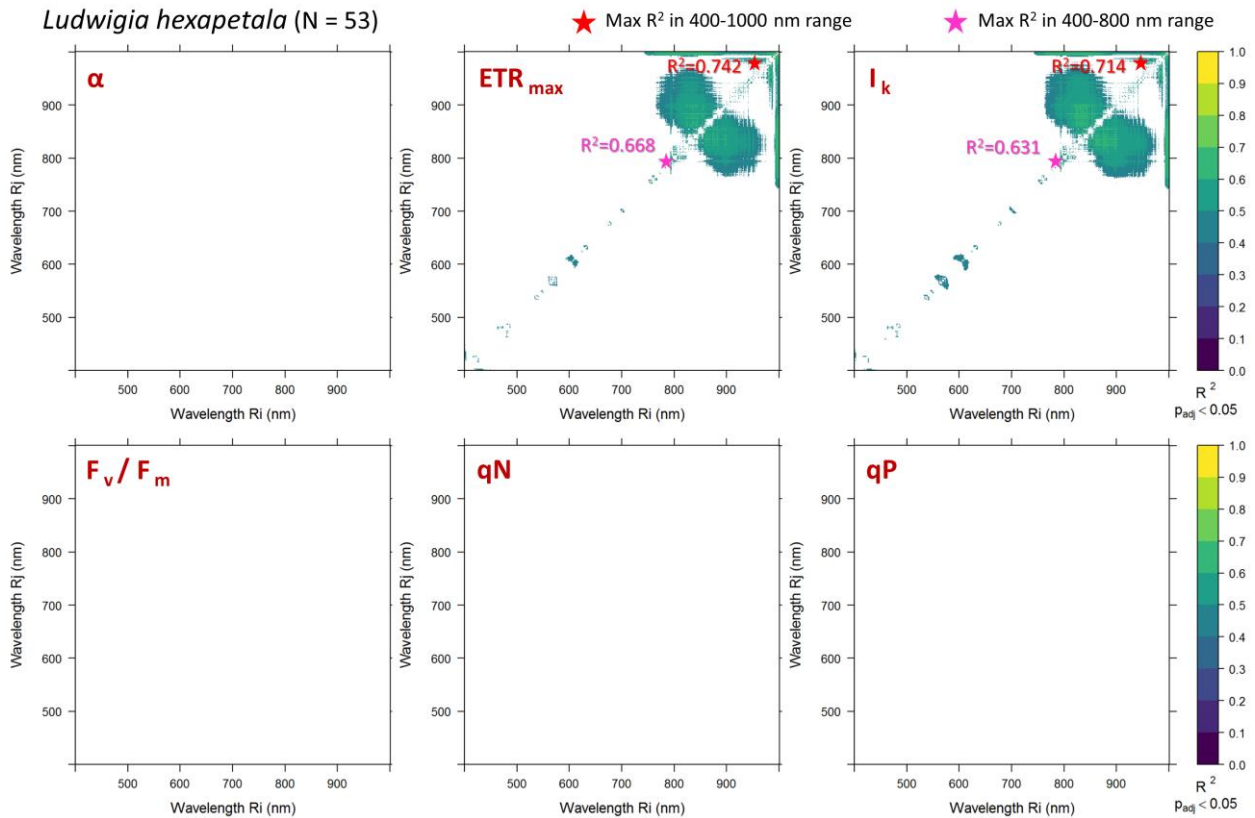

**Supplementary Figure S5.** Statistically significant ( $p < 0.01$ , Bonferroni adjusted) NDSI correlations with leaf photophysiology parameters measured on *Ludwigia hexapetala* samples (N = 53) in the visible to near-infrared spectral range (400-1000 nm).





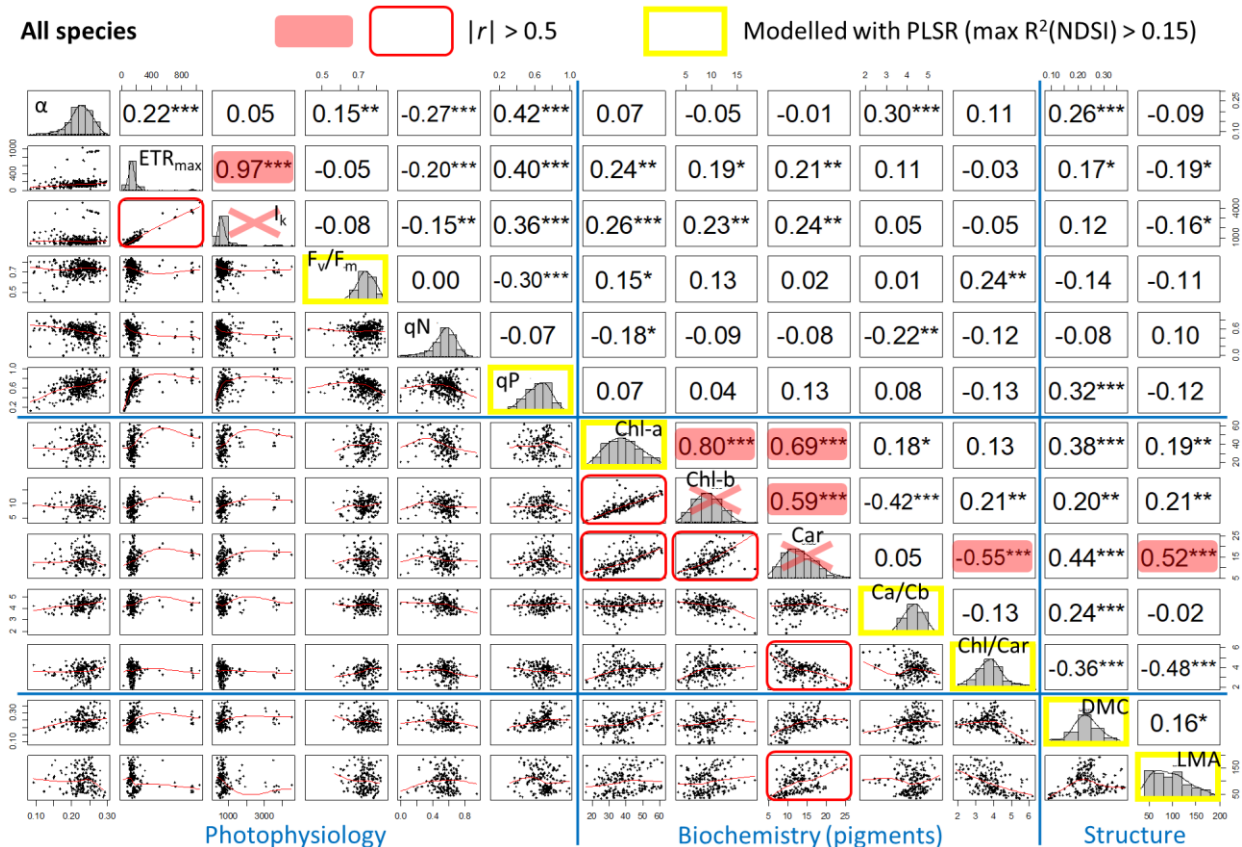

**Supplementary Figure S9.** Correlation matrix of leaf traits measured over 6 species. Pairwise scatter plots are shown in the lower left half, histograms are shown on the diagonal, and the coefficient of correlation (Pearson's  $r$ ) of each pair of traits is shown in the upper right half, including info about its significance level (\*  $p < 0.05$ , \*\*  $p < 0.01$ , \*\*\*  $p < 0.001$ ).

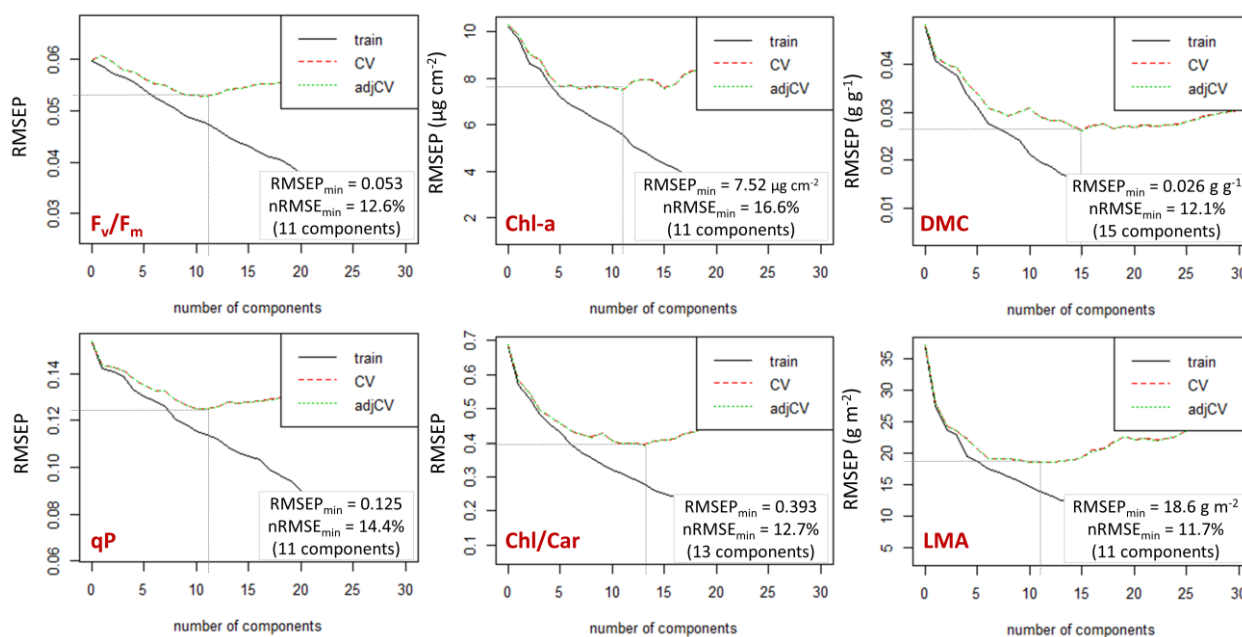

**Supplementary Figure S10.** Variation of root mean square error of prediction (RMSEP) with PLSR model components, computed against the full dataset (training or leave-one-out cross-validation) for selected leaf traits estimated from leaf spectral reflectance for all macrophyte species sampled.



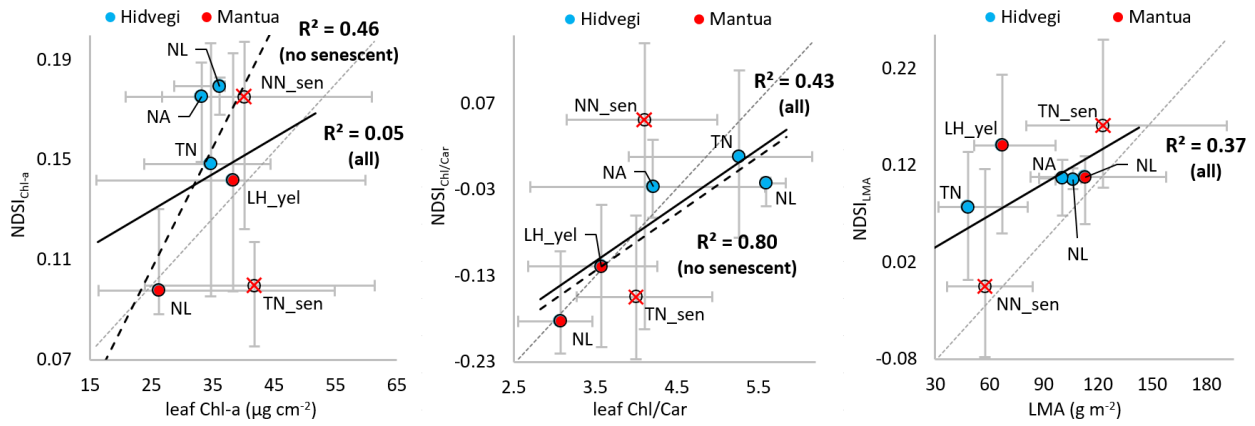

**Supplementary Figure S11.** Comparison of distribution of selected spectral proxies (NDSI) derived from APEX data at Lake Hídvegi and Mantua lakes system for mono-specific stands and connected proxies leaf traits measured in our dataset (at peak of growth conditions). Data points represent median scores and whiskers delimit the extremes of values observed. Linear regression lines and their coefficient of determination ( $R^2$ ) separating stands in senescence phase at the time of overflight over Mantua site (27 September 2014) are superimposed on the graphs. LH\_yel: *Ludwigia hexapetala* (with signs of chlorotic conditions); NN\_sen: *Nelumbo nucifera* (in early senescence phase); NL: *Nuphar lutea*; NA: *Nymphaea alba*; TN: *Trapa natans*; TN\_sen: *Trapa natans* (around senescence conditions).
